# Supplementary material for: Blockade of the amino acid transporter SLC6A14 suppresses tumor growth in colorectal Cancer
Source: BMC Cancer. 2022 Jul 30;22:833. doi: 10.1186/s12885-022-09935-0 (PMC9339205; doi:10.1186/s12885-022-09935-0)
Supplement: Supplementary file 1 — Additional file 1. [file 12885_2022_9935_MOESM1_ESM.pdf]

Supplementary Figure 1

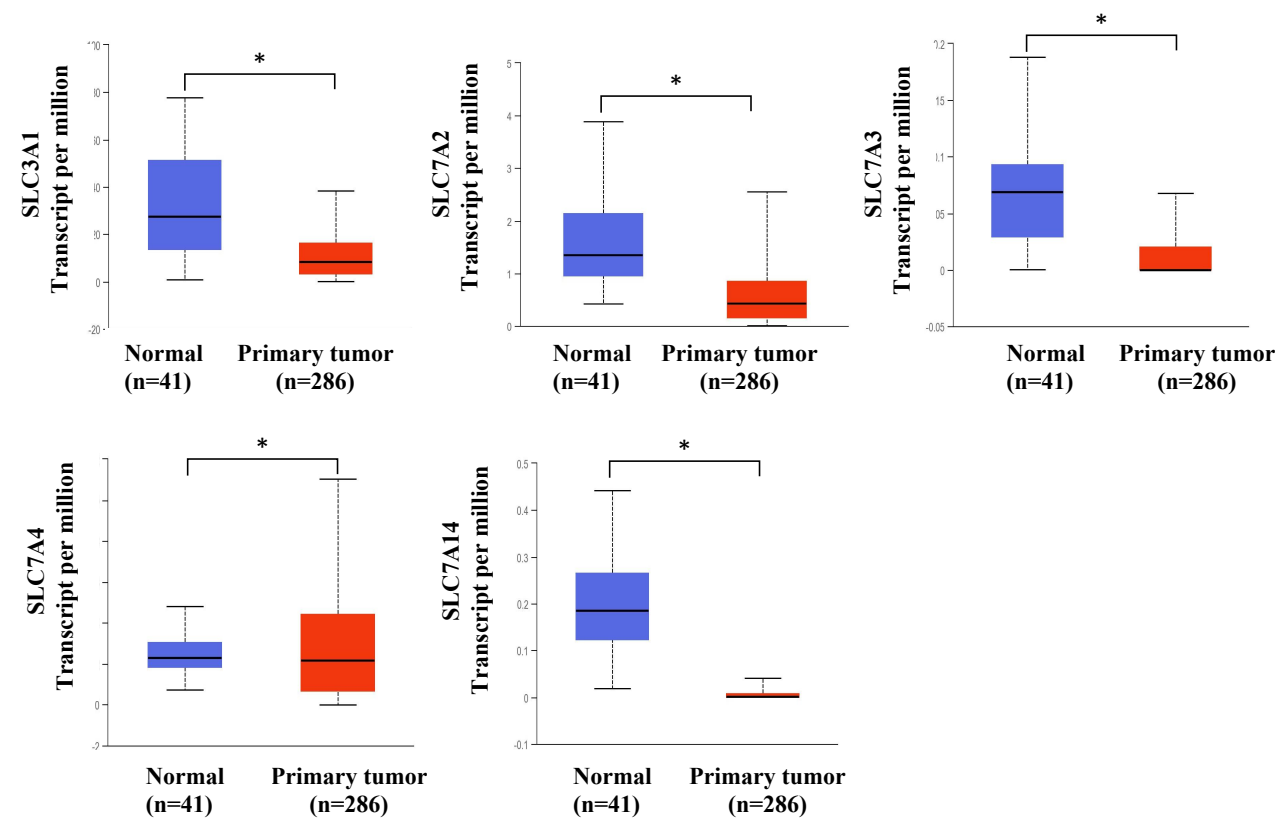

# Supplementary Figure 2

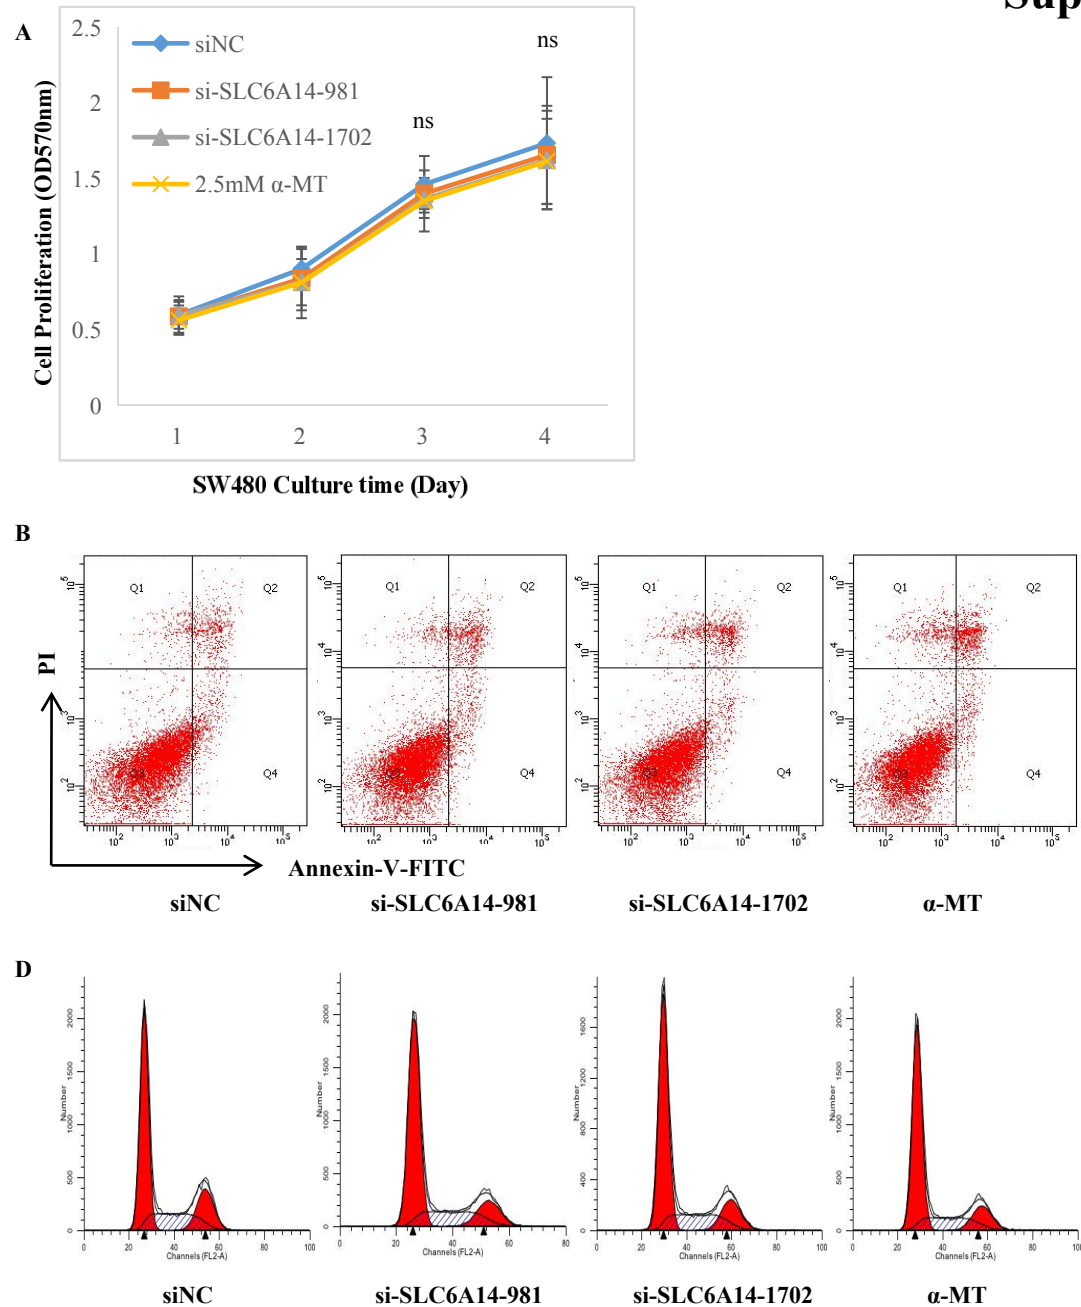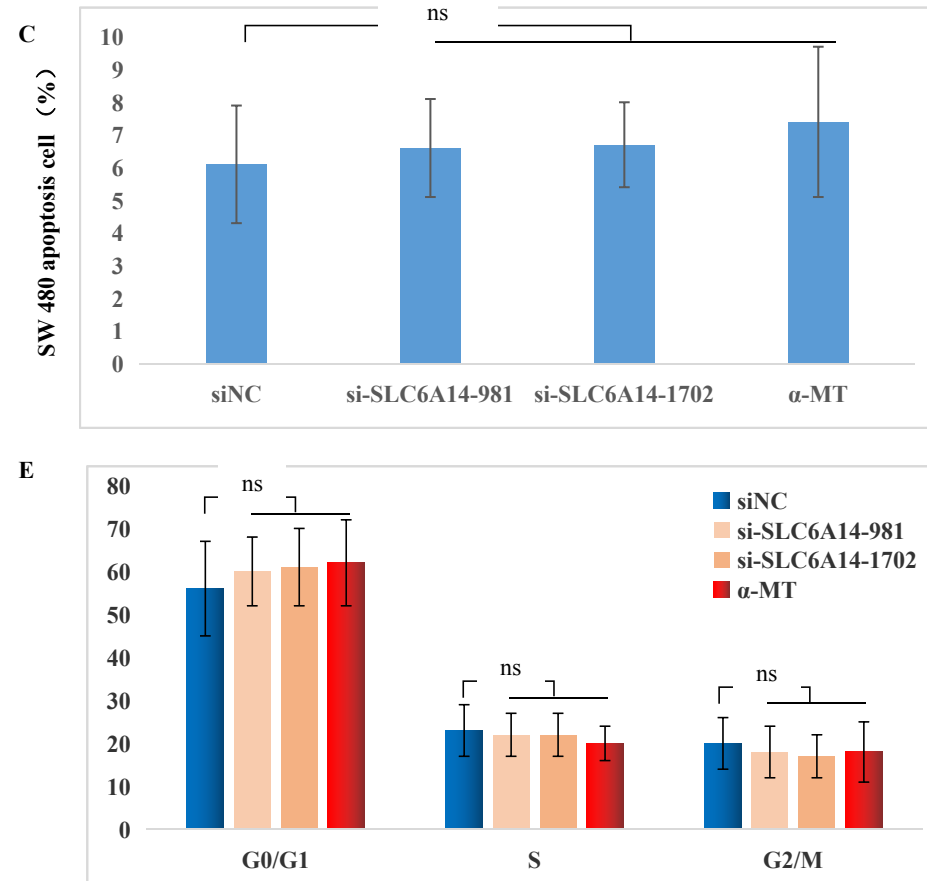

# Supplementary Figure 3

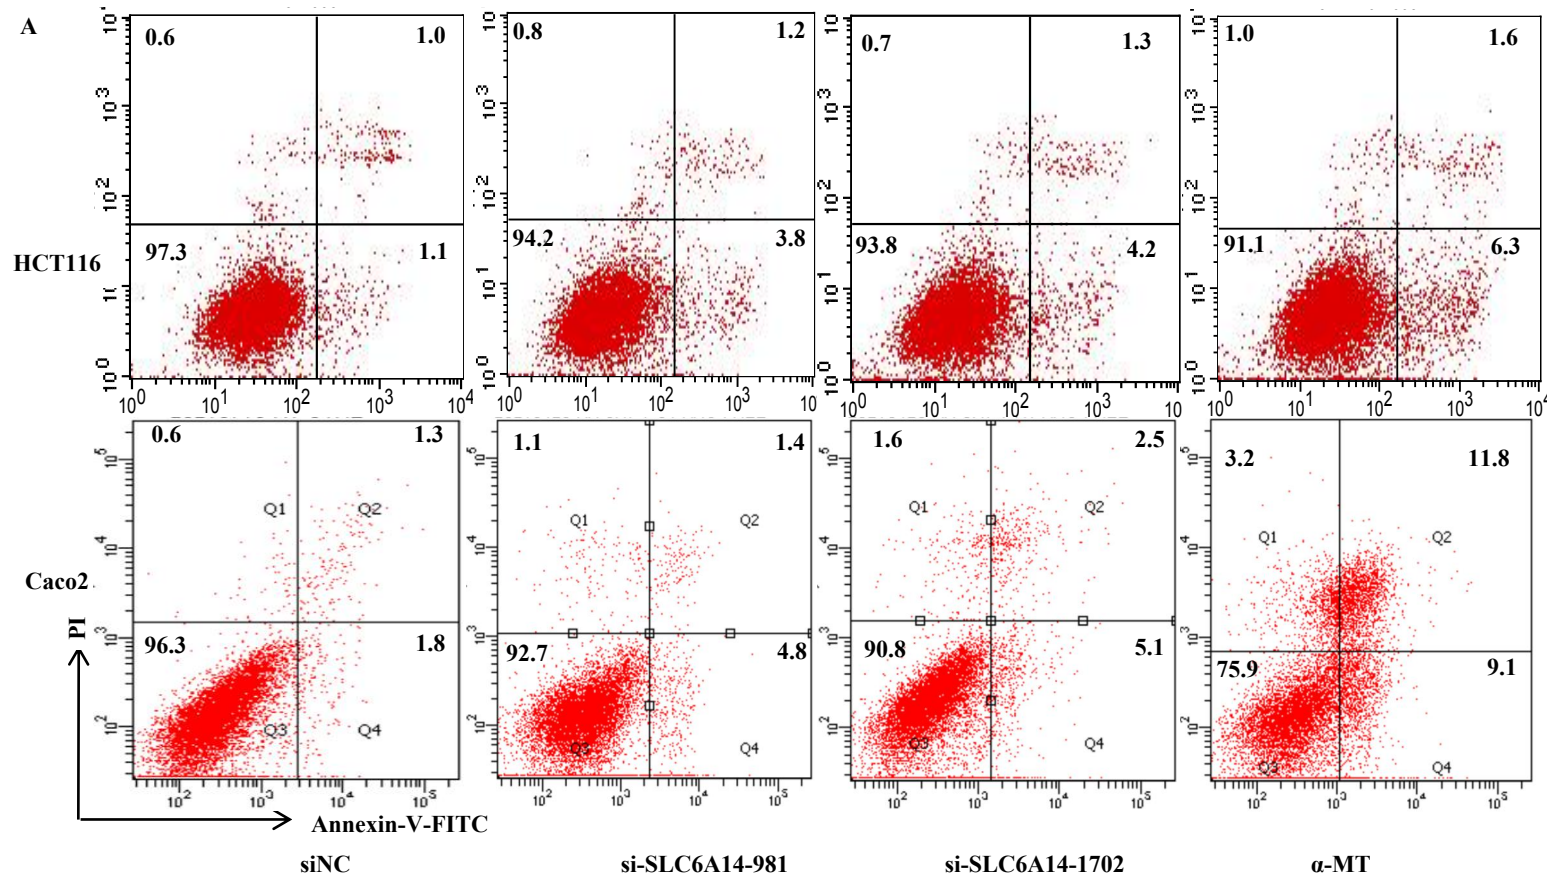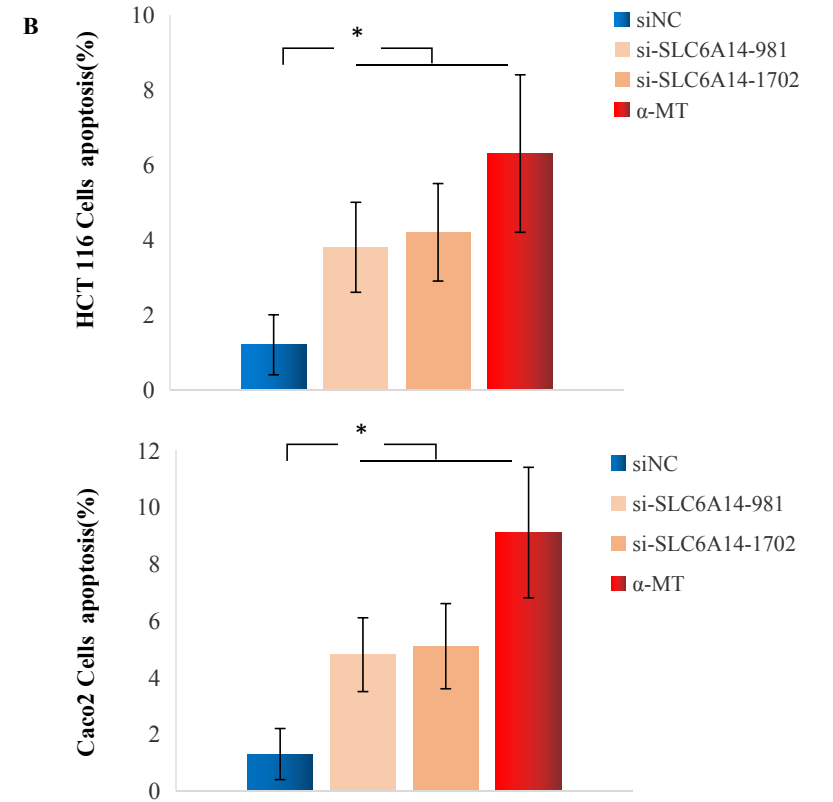

# Supplementary Figure 4

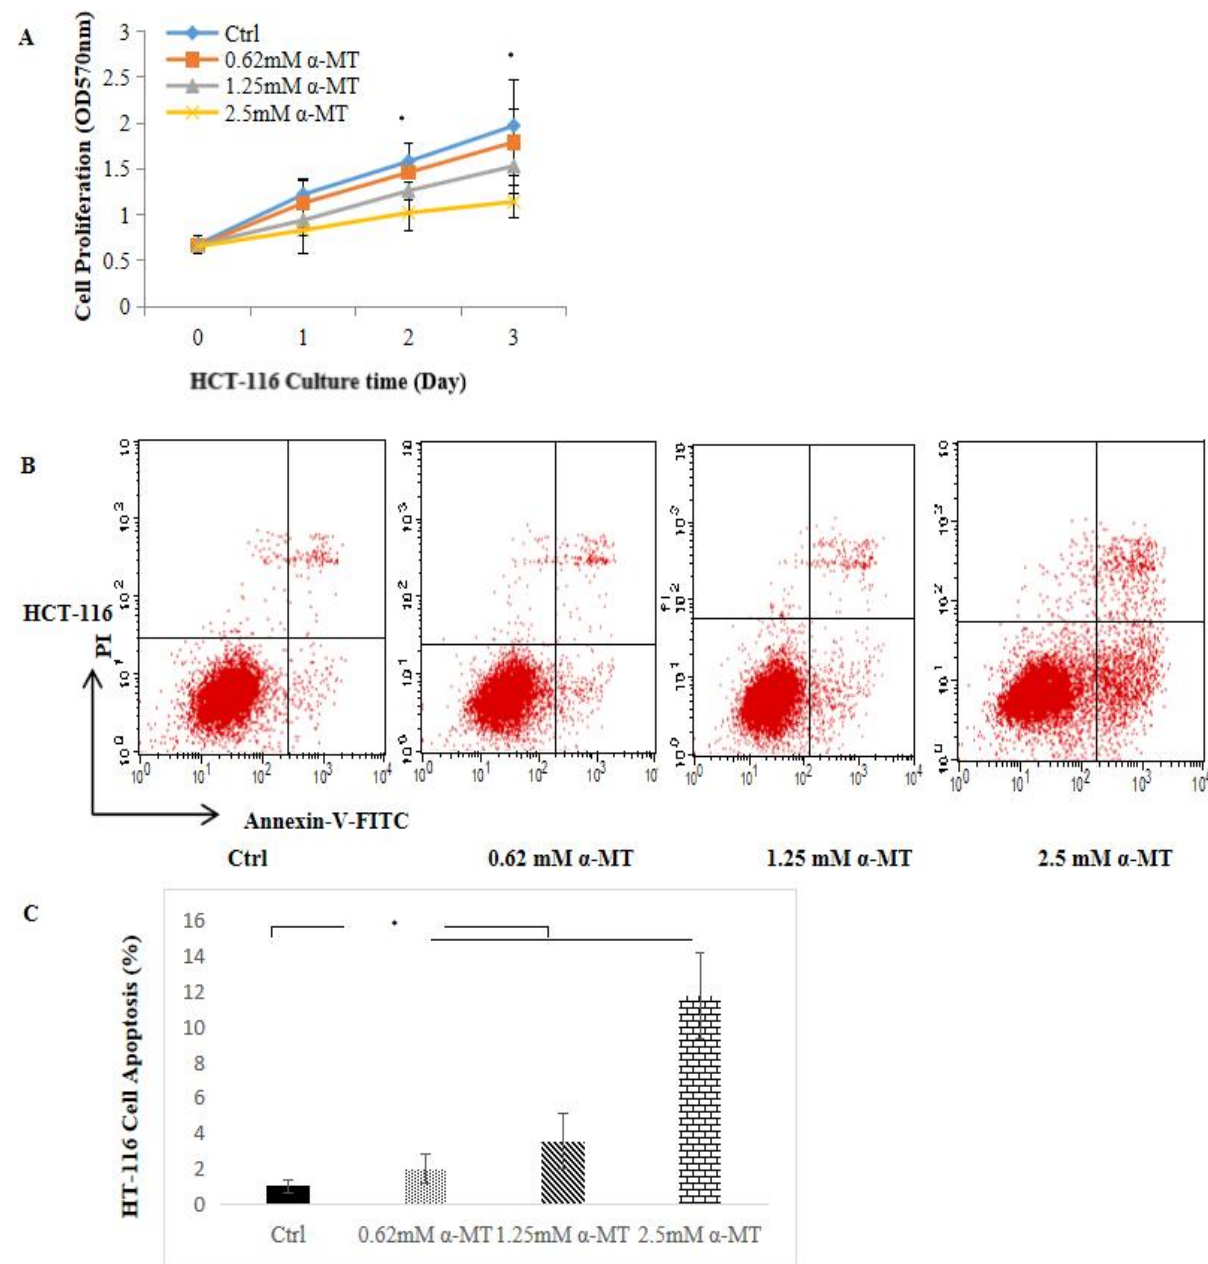

## Supplementary Figure 5

**Ctrl**

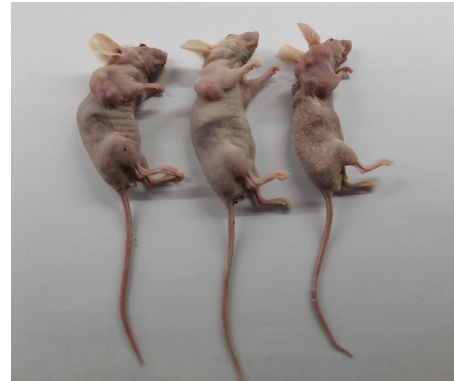

**$\alpha$ -MT**

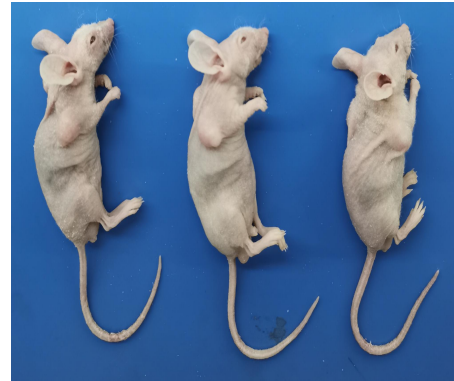

## SUPPLEMENTARY FIGURE LEGENDS

**Supplementary Fig. 1** The publicly available TCGA database was used to analyze the mRNA expression levels of SLC3A1, SLC7A2, SLC7A3, SLC7A4 and SLC7A14 in colorectal cancer. \* $P < 0.05$ .

**Supplementary Fig. 2 The effects of knockdown or blockade of SLC6A14 in SW480 cells.** **a** The growth curve of the SW480 cells that were transfected with SLC6A14-siRNA or blockade of SLC6A14 with  $\alpha$ -MT, as determined by MTT assay. **b** The cell apoptosis of the SW480 cells transfected with SLC6A14-siRNA or treated with  $\alpha$ -MT cultured in FBS-free medium was stained with Annexin-V/PI and examined by flow cytometry. **c** The quantification of apoptotic cells identified as PI-negative and Annexin-V-positive staining. **d** Cell cycle analysis  $G_1/S$  transition of the SW480 cells transfected with SLC6A14-siRNA or treated with  $\alpha$ -MT by flow cytometry. **e** Quantification of cell cycle analysis. The data are expressed as the mean  $\pm$  SD of three independent experiments.

**Supplementary Fig. 3 Knockdown or blockade of SLC6A14 promotes apoptosis in the medium with 10% FBS.** **a** The cell apoptosis of the HCT116 or Caco2 cells transfected with SLC6A14-siRNA or treated with  $\alpha$ -MT cultured in 10% FBS medium was stained with Annexin-V/PI and examined by flow cytometry. **b** The quantification of apoptotic cells

identified as PI-negative and Annexin-V-positive staining. The data are expressed as the mean $\pm$ SD of three independent experiments. \* $P < 0.05$ .

**Supplementary Fig. 4 The effects of different concentrations of  $\alpha$ -MT on cell proliferation and apoptosis.** **a** The growth curve of the HCT116 cells treated with 0mM, 0.62mM, 1.25mM and 2.5mM  $\alpha$ -MT, as determined by MTT assay. **b** The cell apoptosis of the HCT116 cells treated with 0mM, 0.62mM, 1.25mM and 2.5mM  $\alpha$ -MT was stained with Annexin-V/PI and examined by flow cytometry. **c** The quantification of apoptotic cells identified as PI-negative and Annexin-V-positive staining.

**Supplementary Fig. 5** Two pictures of another 6 mice.

# WB raw blots

## Figure 1

Figure 1C-SLC6A14

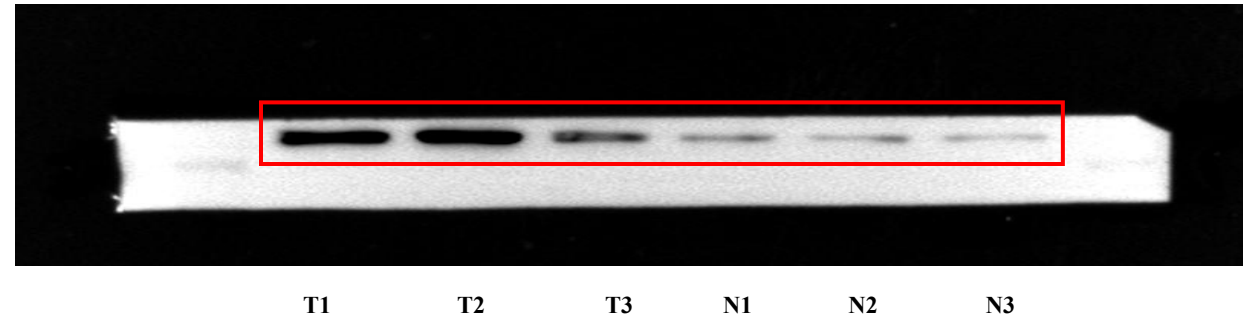

Figure 1E-SLC6A14

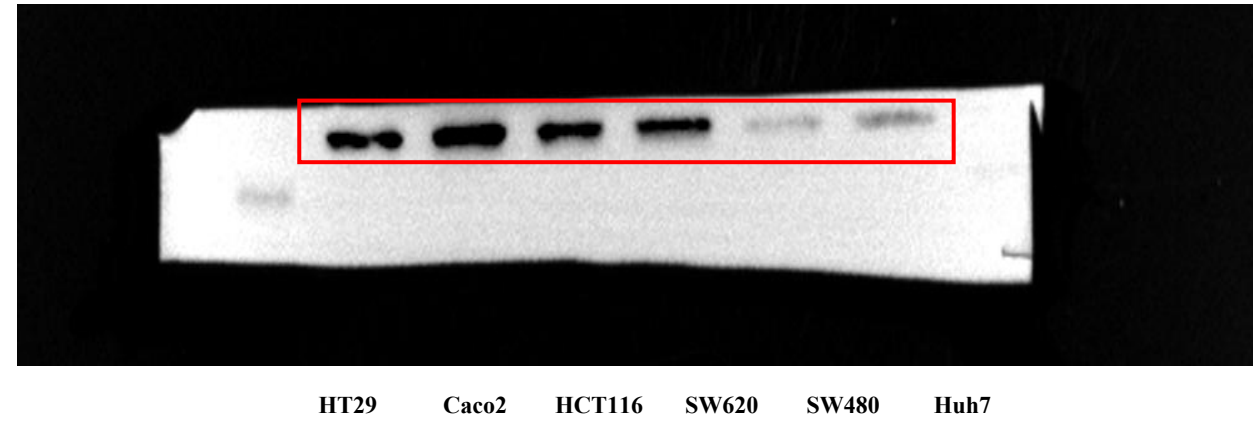

Figure 1E- $\beta$ -actin

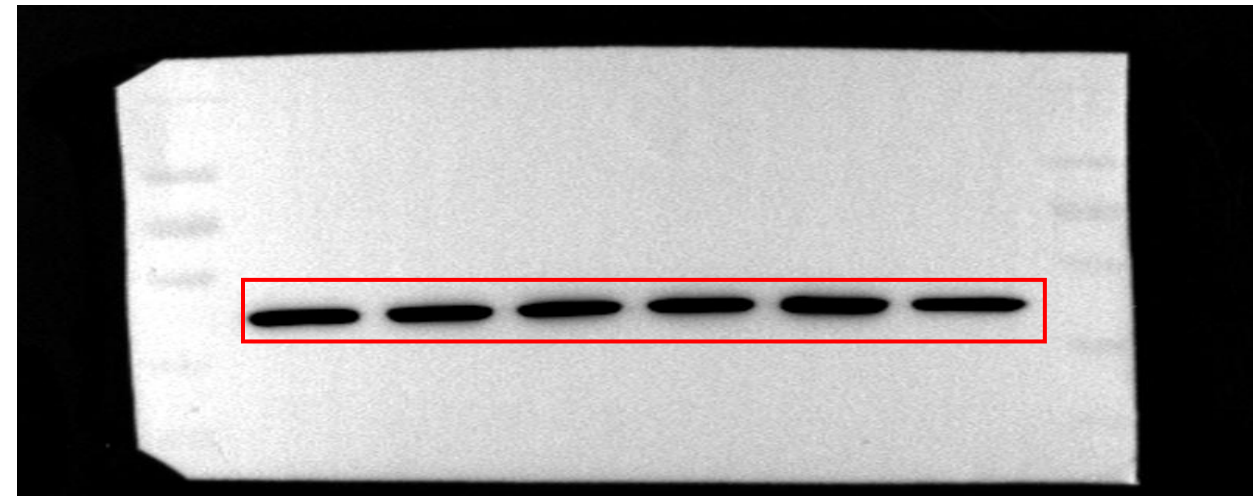

WB raw blots  
Figure 3

Figure 3A-SLC6A14

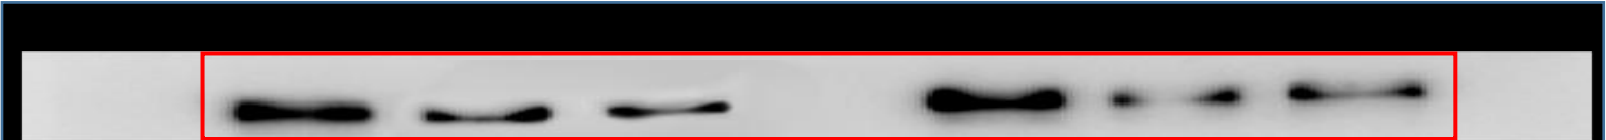

Figure 3A-actin

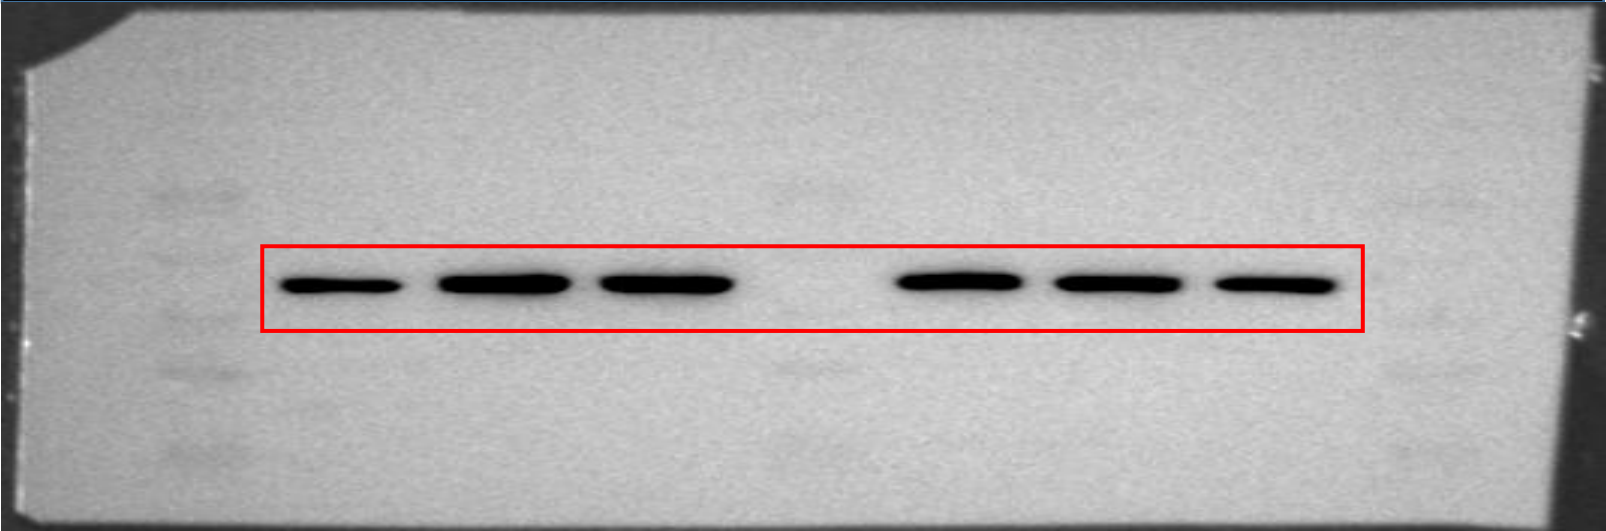

siNC      si-SLC6A14-981      si-SLC6A14-1702  
-----  
HCT116

siNC      si-SLC6A14-981      si-SLC6A14-1702  
-----  
Caco2

# WB raw blots

## Figure 6A-HCT116-mTOR

Figure 6 A-  
mTOR-HCT116

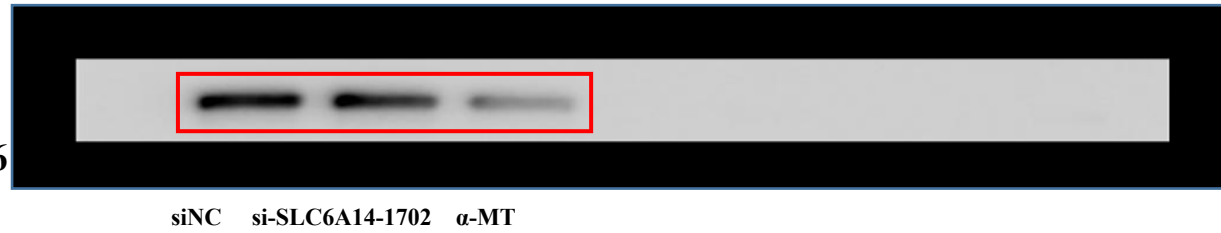

Figure 6A-P-  
mTOR-HCT116

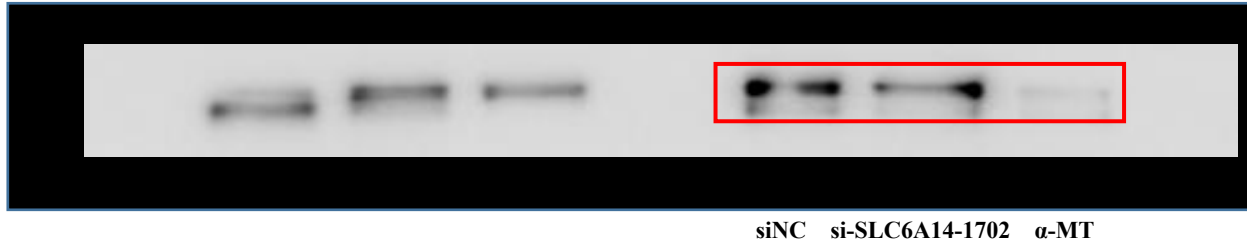

Figure 6A-  
GbL-HCT116

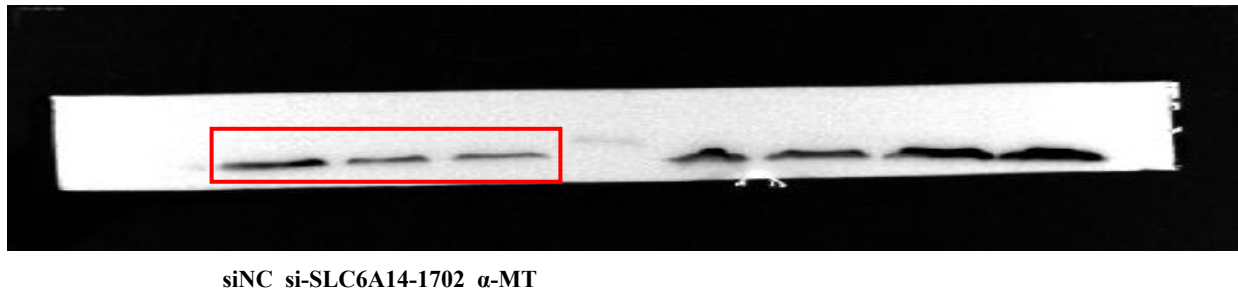

Figure 6A-  
actin-HCT116

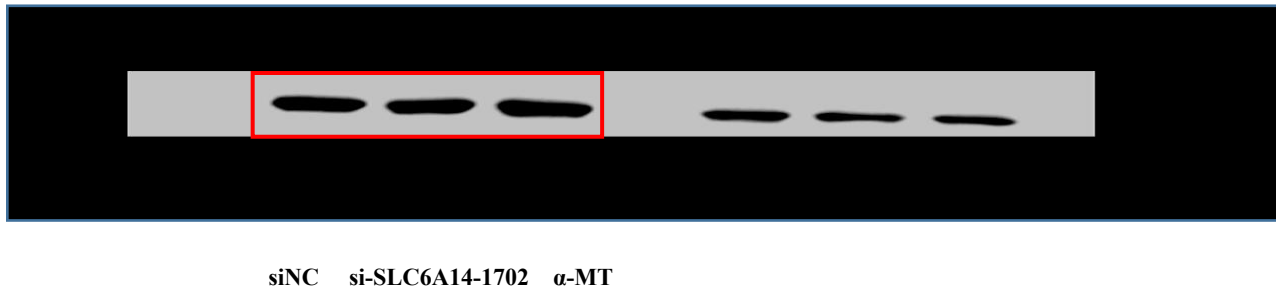

Figure 6A-  
Raptor-HCT116

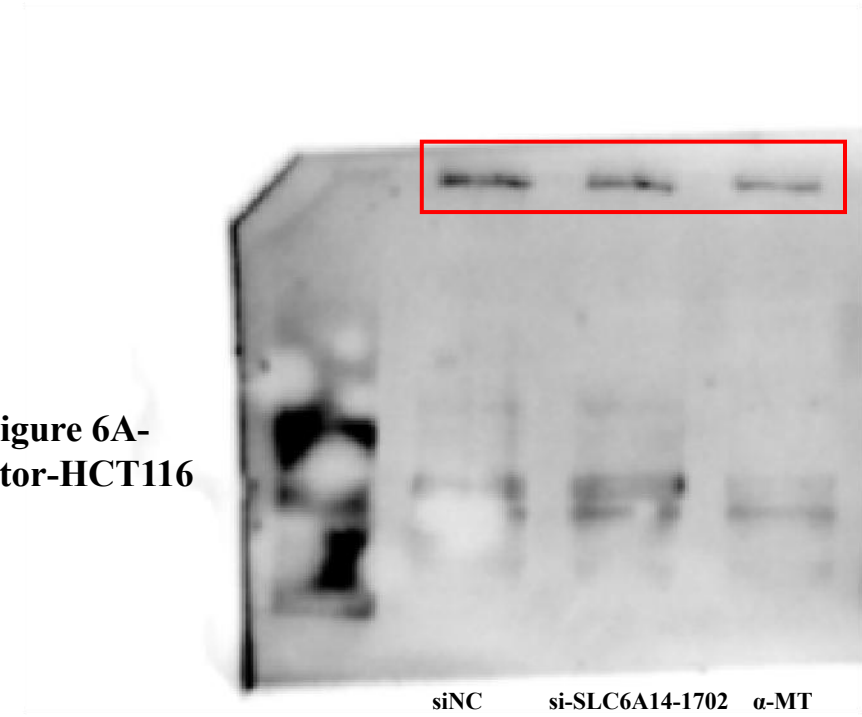

# WB raw blots

## Figure 6A-Caco2-mTOR

Figure 6A-actin-Caco2

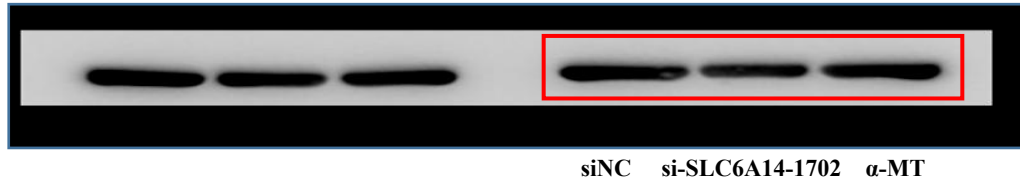

Figure 6A-P-mTOR-Caco2

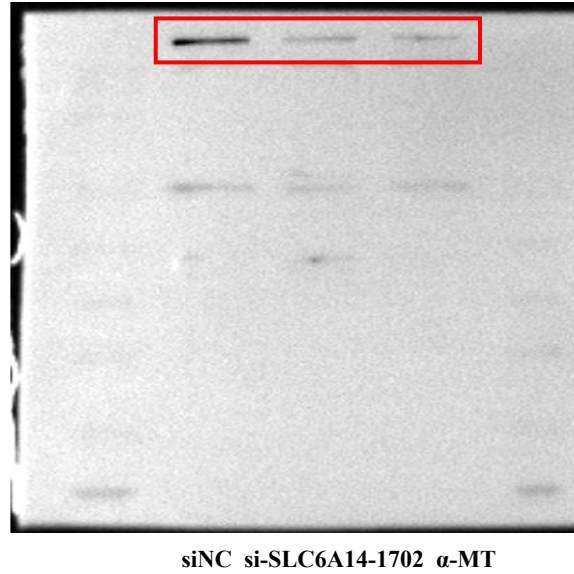

Figure 6A-mTOR-Caco2

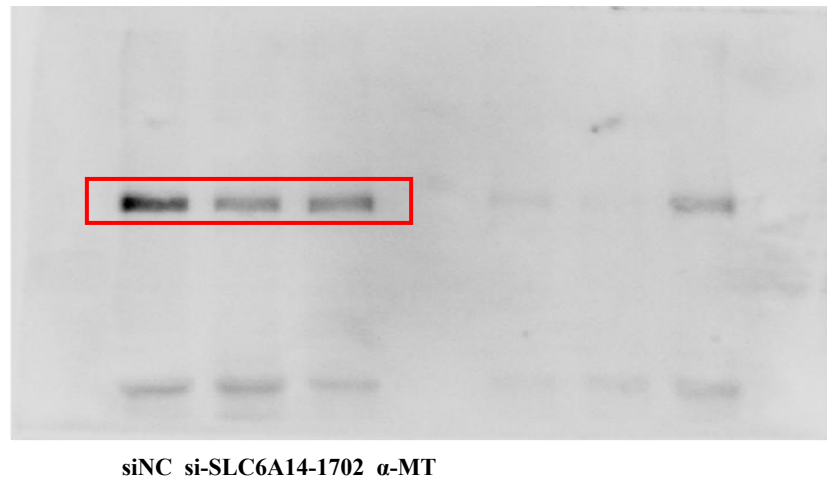

Figure 6A-GbL-Caco2

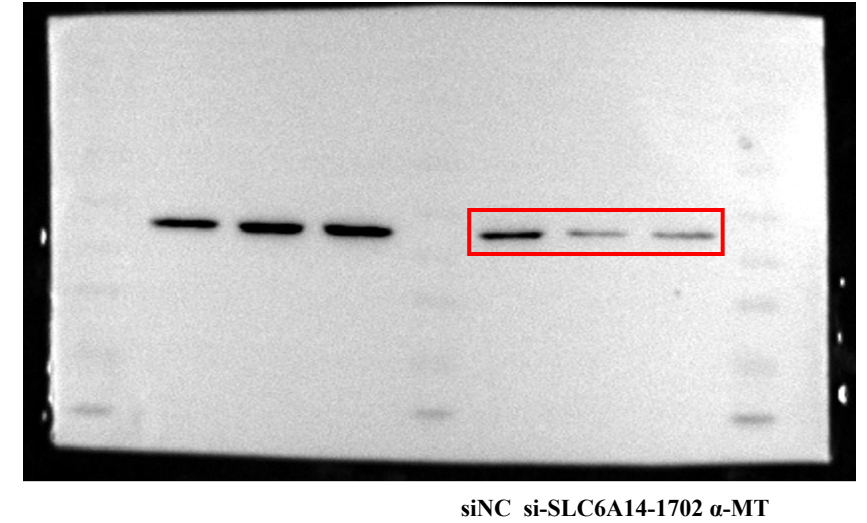

Figure 6A-P-Raptor-Caco2

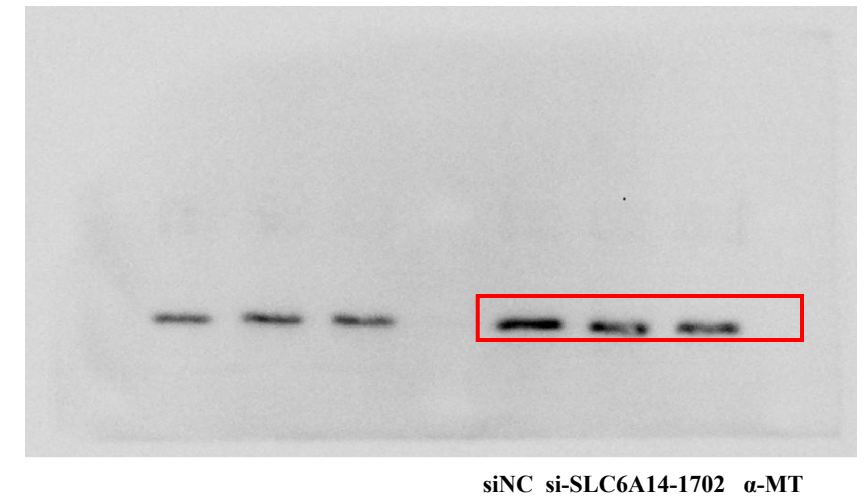

**WB raw blots**  
**Figure 6A-HCT116-MMPs**

**Figure 6A-MMP2-HCT116**

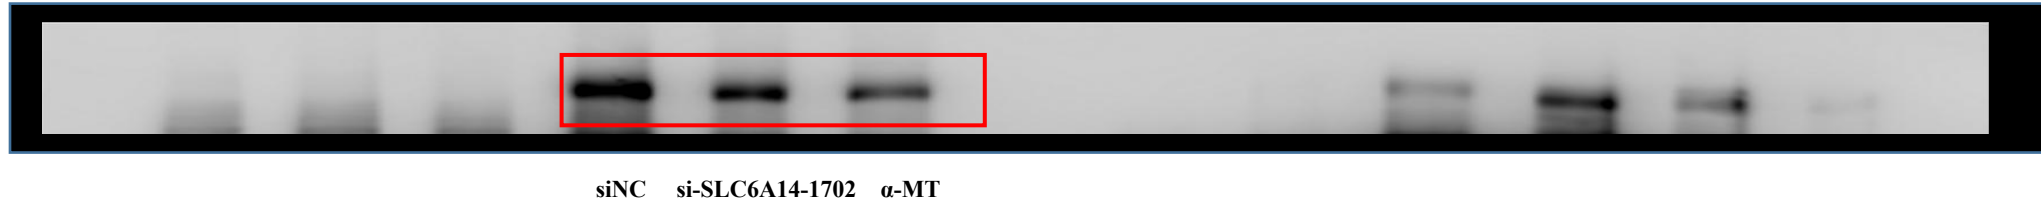

**Figure 6A-MMP9-HCT116**

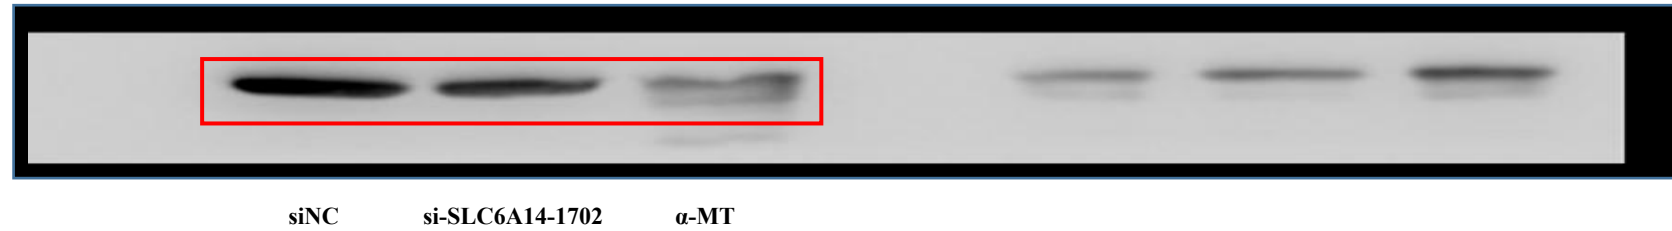

**Figure 6A-MT1-HCT116**

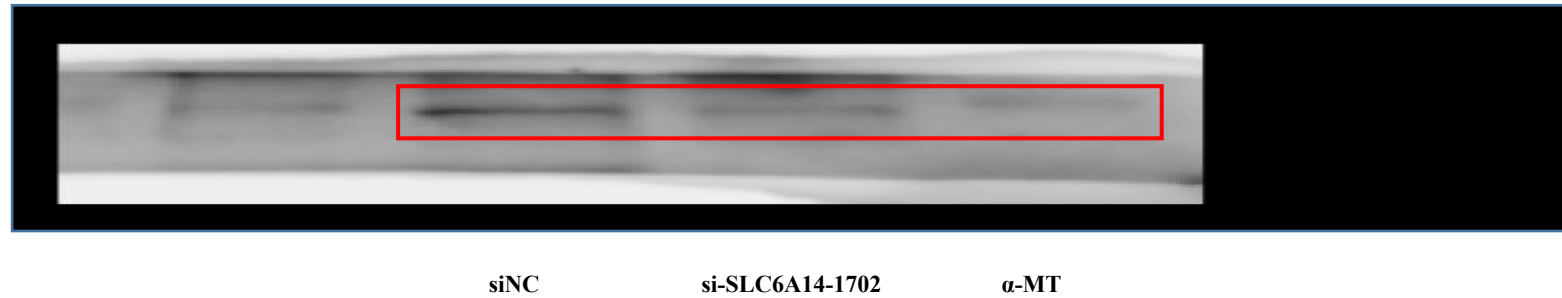

**Figure 6A-SLC6A14-HCT116**

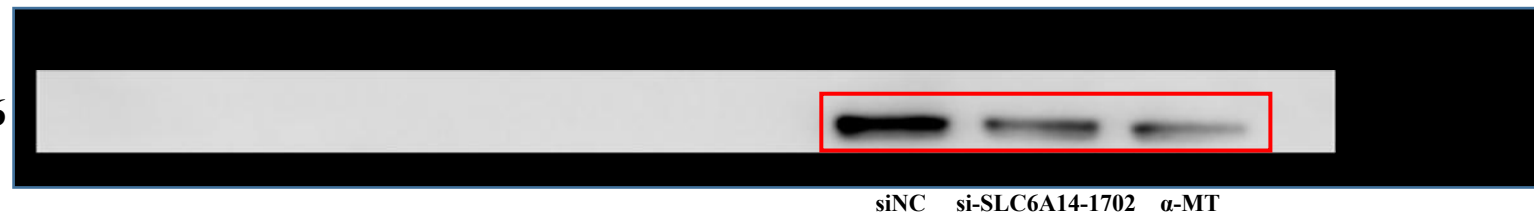

**WB raw blots**  
**Figure 6A-Caco2-MMPs**

**Figure 6A-MMP2-Caco2**

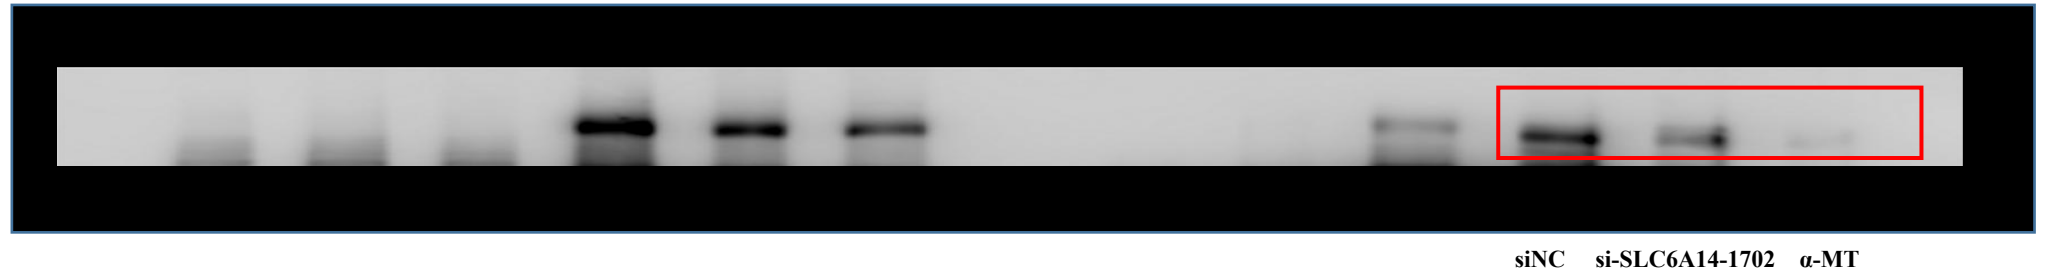

**Figure 6A-MMP9-Caco2**

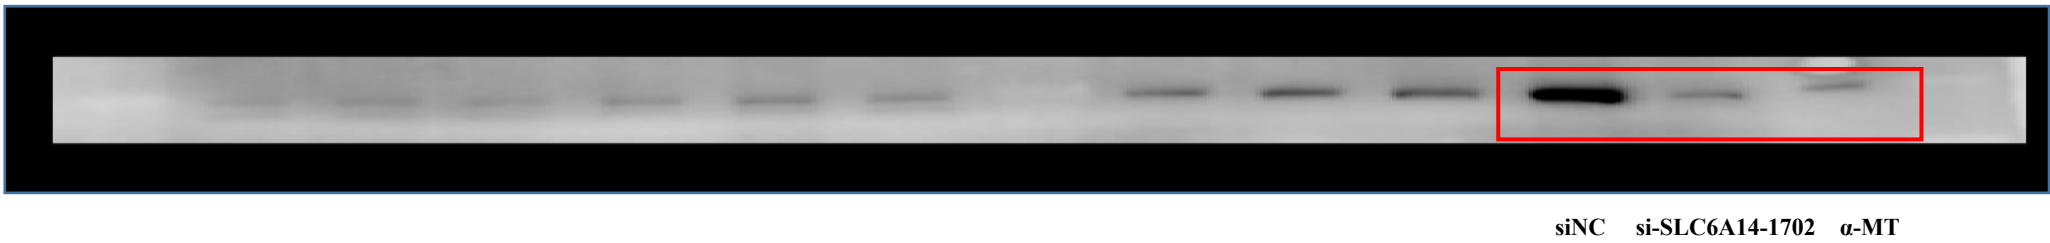

**Figure 6A-MT1-Caco2**

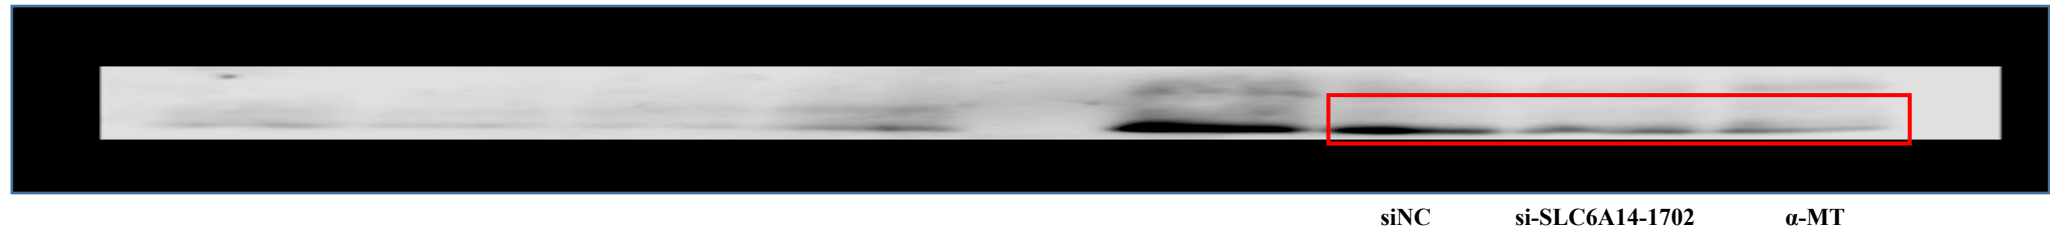

**Figure 6A-SLC6A14-Caco2**

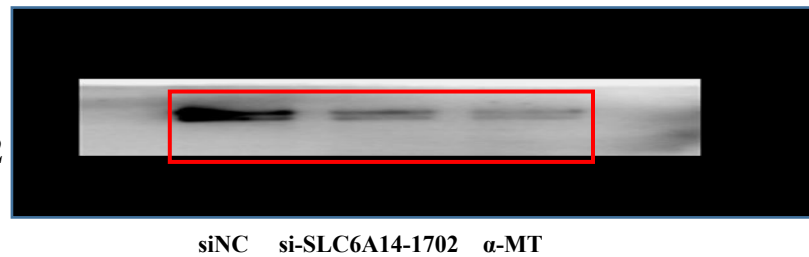

**WB raw blots**  
**Figure 6D-HCT116**

**Figure 6D-P-p70S6-HCT116**

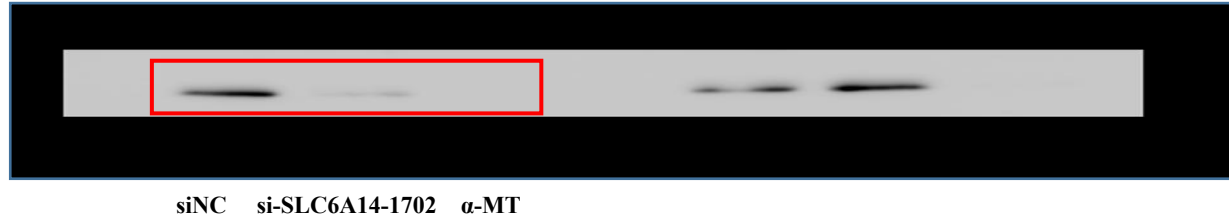

**Figure 6D-P-S6-HCT116**

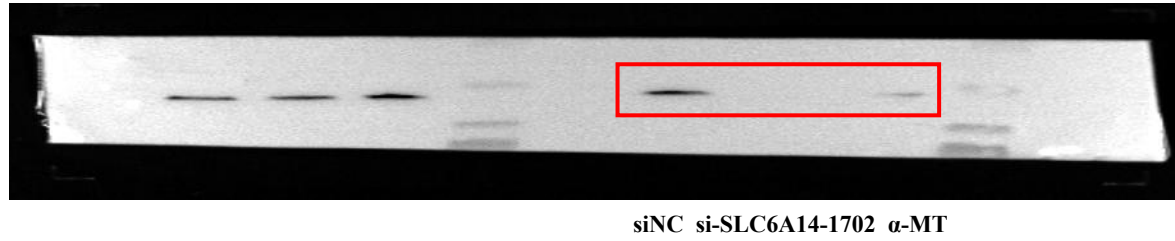

**Figure 6A-P-4EBP1-HCT116**

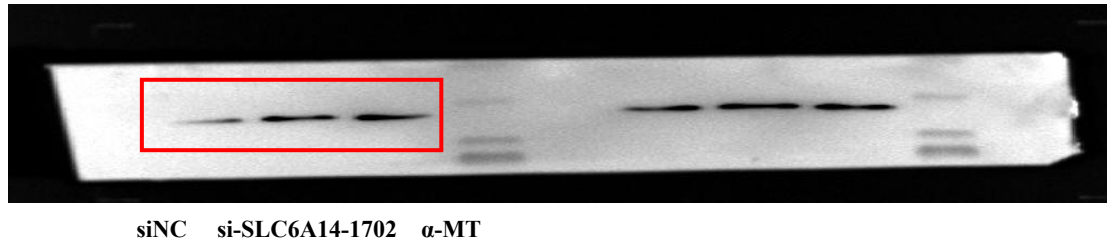

**Figure 6D-actin-HCT116**

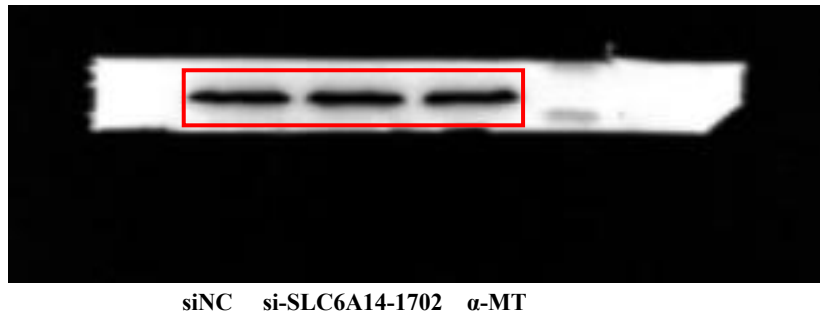

**WB raw blots**  
**Figure 6D-Caco2**

**Figure 6D-P-p70S6-Caco2**

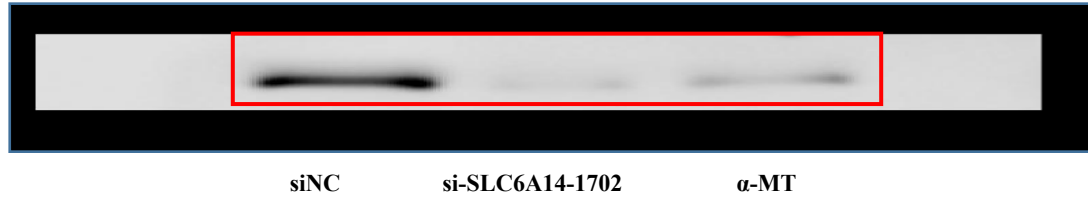

**Figure 6D-P-S6-Caco2**

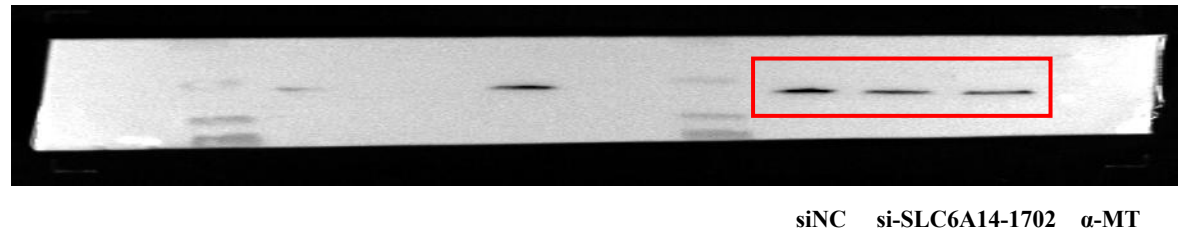

**Figure 6D-P-4EBP1-Caco2**

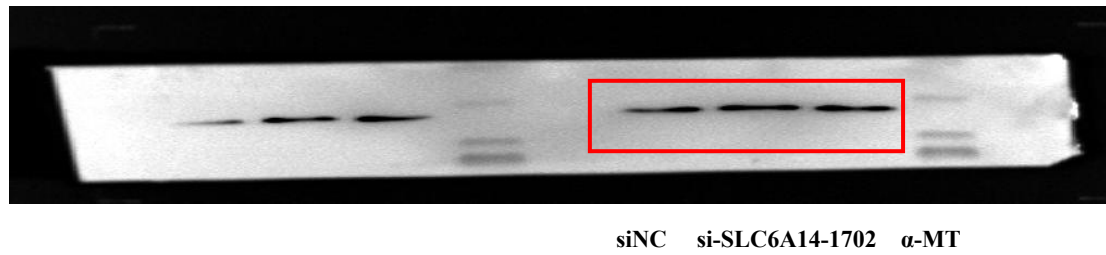

**Figure 6D-actin-Caco2**

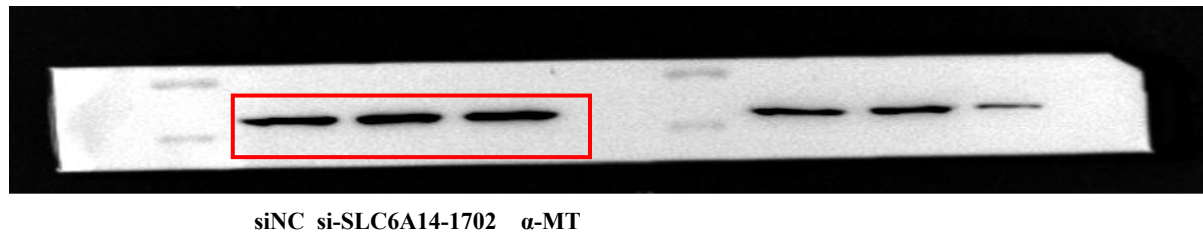

**WB raw blots**  
**Figure 6F-HCT116**

**Figure 6F-Akt-HCT116**

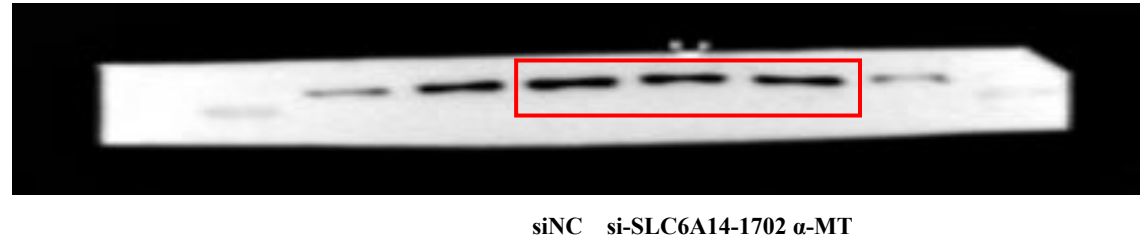

**Figure 6F-P-Akt-HCT116**

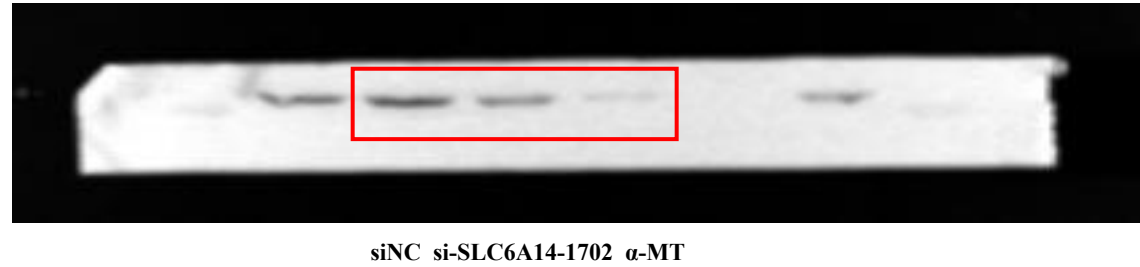

**Figure 6F-actin-HCT116**

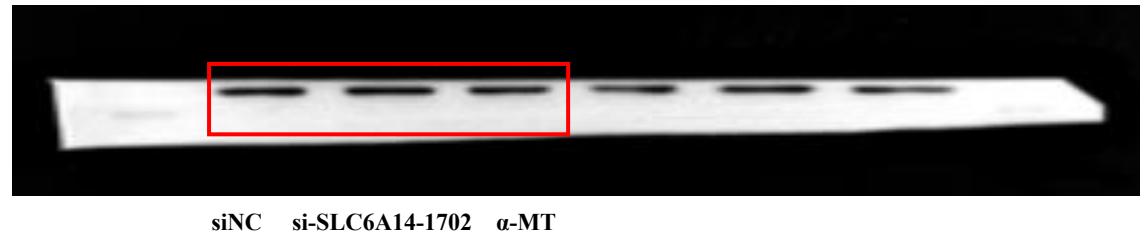

**WB raw blots**  
**Figure 6F-Caco2**

**Figure 6F-Akt-Caco2**

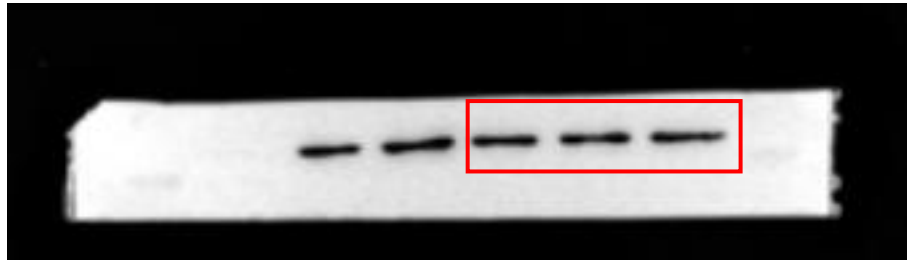

siNC si-SLC6A14-1702  $\alpha$ -MT

**Figure 6F-P-Akt-Caco2**

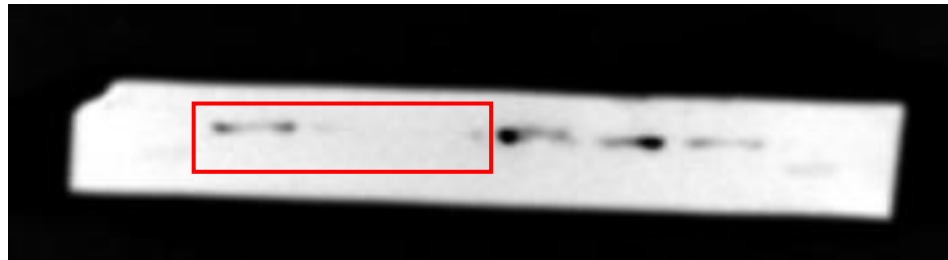

siNC si-SLC6A14-1702  $\alpha$ -MT

**Figure 6F-actin-Caco2**

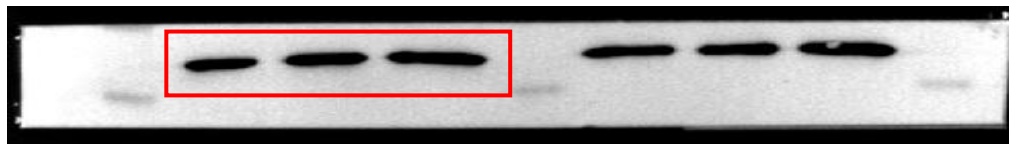

siNC si-SLC6A14-1702  $\alpha$ -MT

**WB raw blots**  
**multiple exposure images**

exposure time = 30s

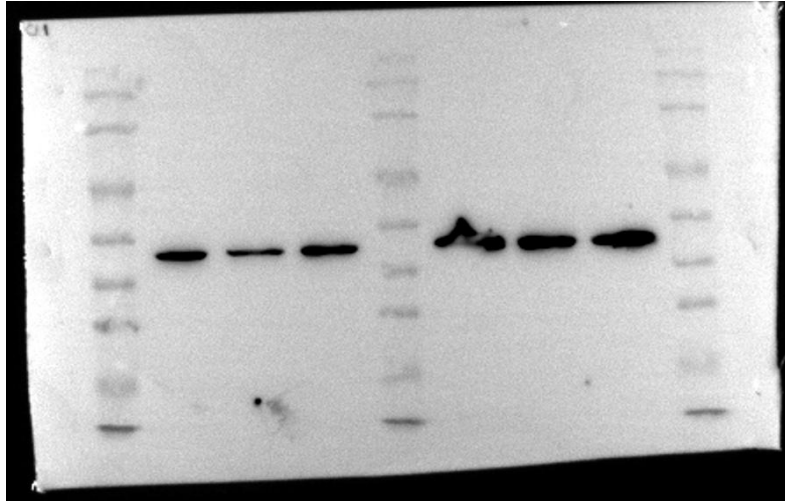

exposure time = 60s

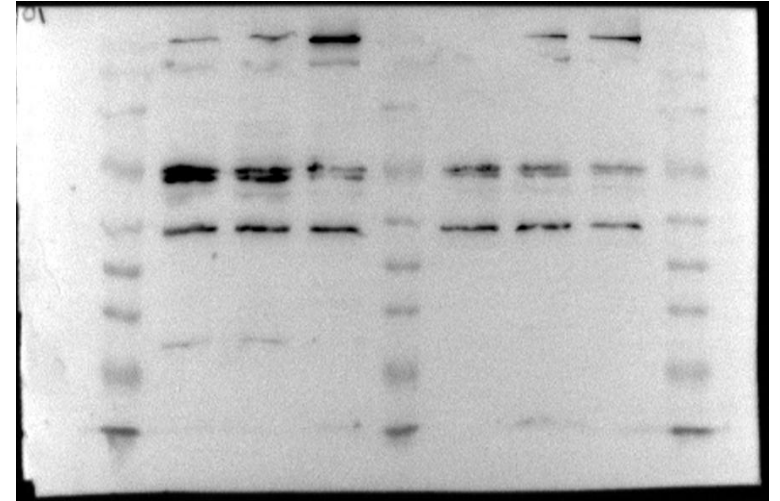

exposure time = 60s

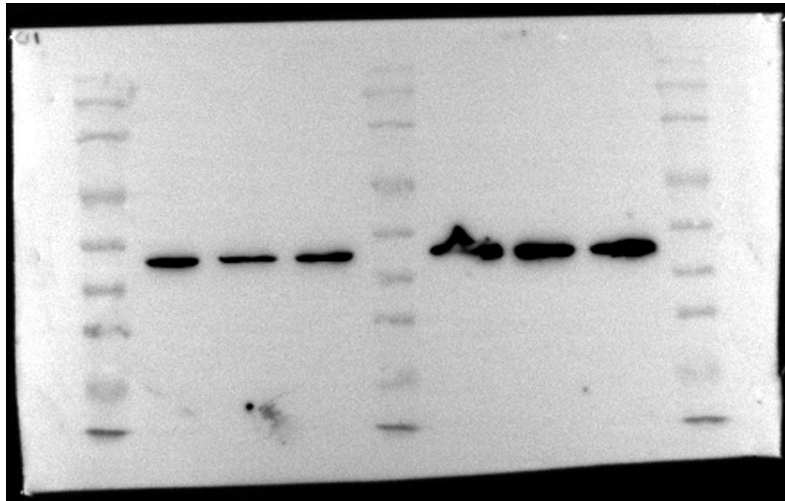

exposure time = 120s

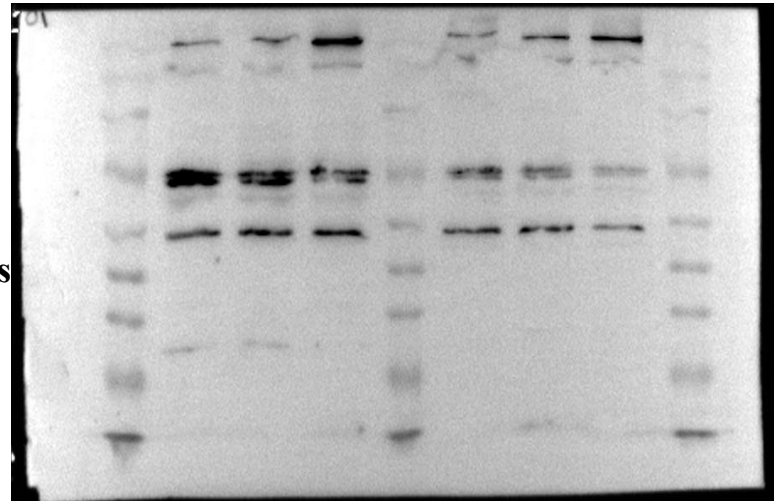

$\beta$ -actin

SLC6A14
